# Supplementary material
Source: bioRxiv or medRxiv preprint supplement (https://medrxiv.org/highwire/filestream/97242/field_highwire_adjunct_files/0/2020.09.16.20196154-1.pdf)
Supplement: Supplementary file [file 2020.09.16.20196154-1.pdf]

| <b>Supplementary Figures</b> |                                                                                                               |
|------------------------------|---------------------------------------------------------------------------------------------------------------|
| Supplementary Figure 1       | Plasma and serum IgG isotype and subclass responses across CoV and control antigen types.                     |
| Supplementary Figure 2       | Plasma and serum IgA, D, and M isotype and subclass responses across CoV and control antigen types.           |
| Supplementary Figure 3       | Plasma and serum Fc $\gamma$ R binding responses across antibodies specific to CoV and control antigen types. |
| Supplementary Figure 4       | Correlative relationships between antibodies specific to SARS CoV-2 and endemic CoV.                          |
| Supplementary Figure 5       | Antibody features associated with clinical status                                                             |
| <b>Supplementary Tables</b>  |                                                                                                               |
| Supplementary Table 1        | Demographic data for convalescent plasma (JHMI) and convalescent serum (DHMC)                                 |
| Supplementary Table 2        | Fc Array Reagents                                                                                             |
| Supplementary Table 3        | Sample Dilutions in the Fc Array Assay                                                                        |

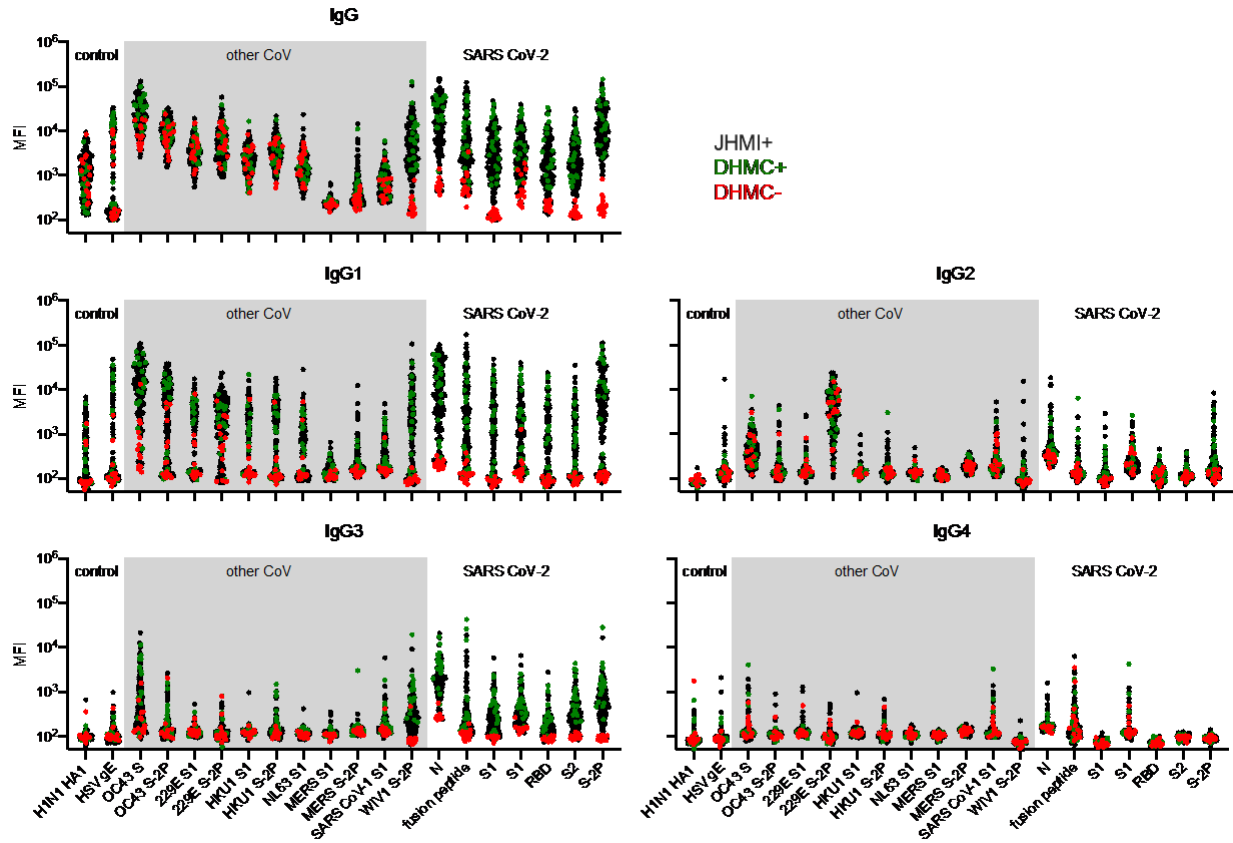

**Supplementary Figure 1. Plasma (JHMI) and serum (DHMC) IgG isotype and subclass responses across CoV and control antigens.** Samples from convalescent (+) donors are indicated in black and green, and those from SARS-CoV-2 naive (-) subjects in red.

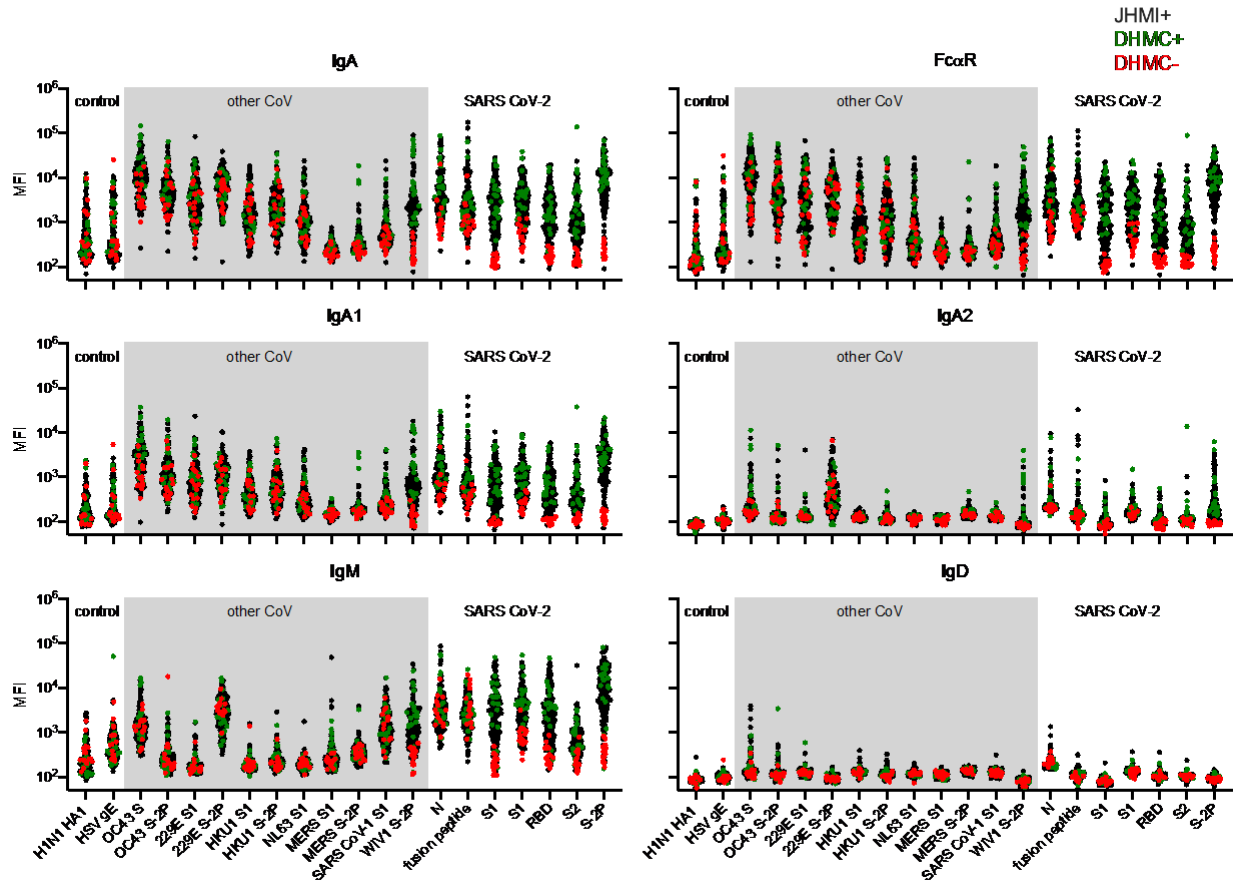

**Supplementary Figure 2. Plasma (JHMI) and serum (DHMC) IgA, D, and M isotype and subclass responses across CoV and control antigens.** Samples from convalescent (+) donors are indicated in black and green, and those from SARS-CoV-2 naïve (-) subjects in red.

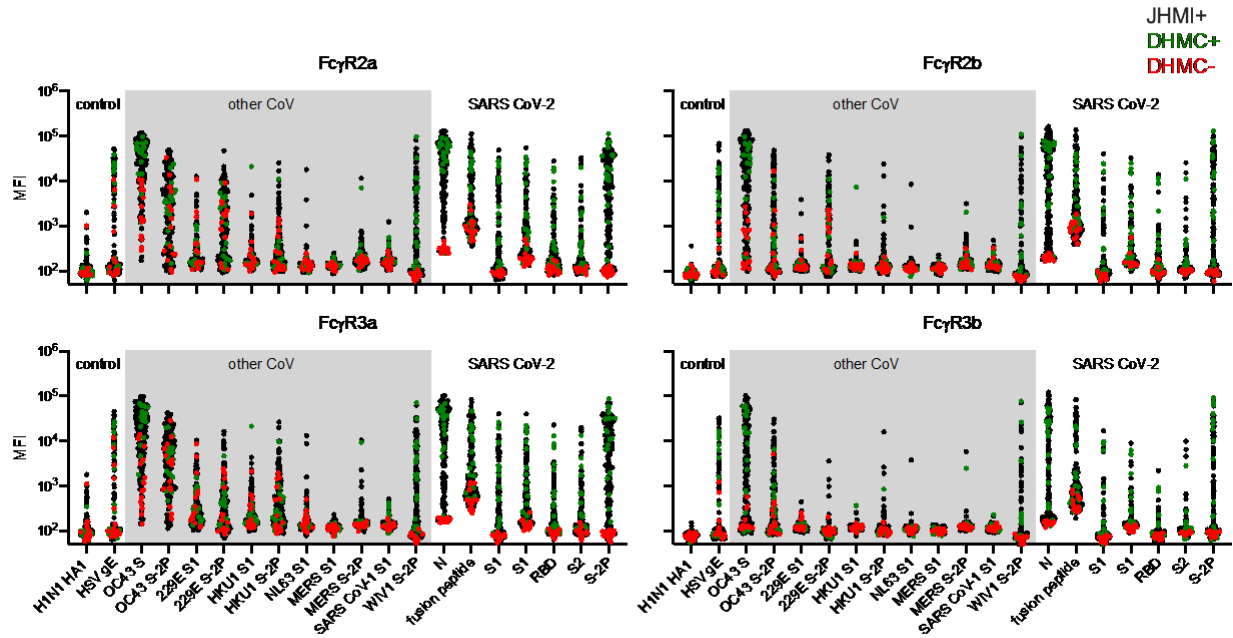

**Supplementary Figure 3. Plasma (JHMI) and serum (DHMC) Fc $\gamma$ R binding responses across antibodies specific to CoV and control antigens.** Samples from convalescent (+) donors are indicated in black and green, and those from SARS-CoV-2 naïve (-) subjects in red.

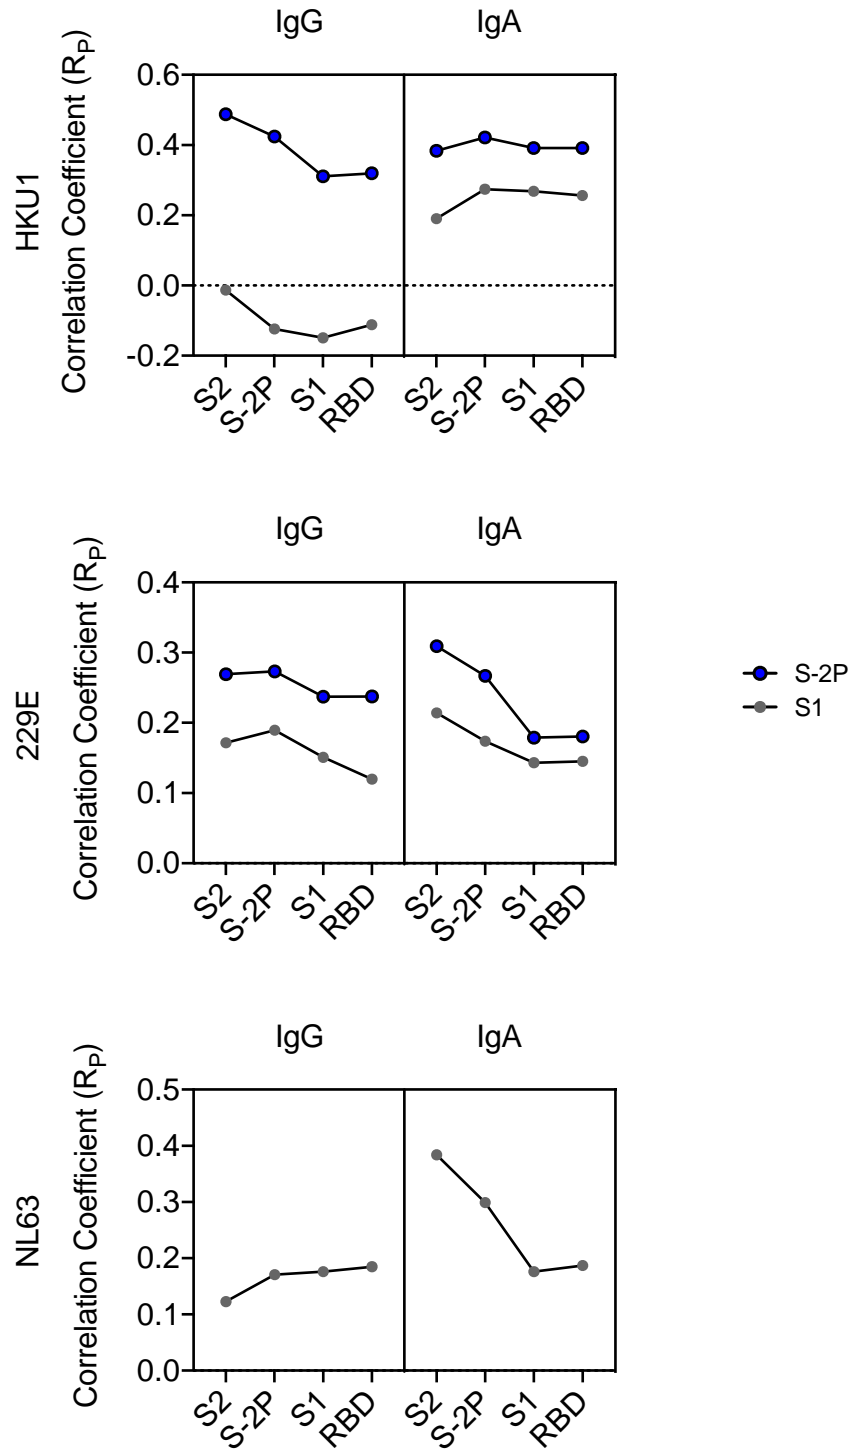

**Supplemental Figure 4. Correlative relationships between antibodies specific to SARS-CoV-2 and endemic CoV.** Pearson correlation coefficients ( $R_p$ ) between SARS-CoV-2 specific IgG and IgA responses and IgG and IgA responses to endemic CoV S-2P (blue) and S<sub>1</sub> (gray) proteins for HKU1 (top), 229E (center), and NL63 (bottom).

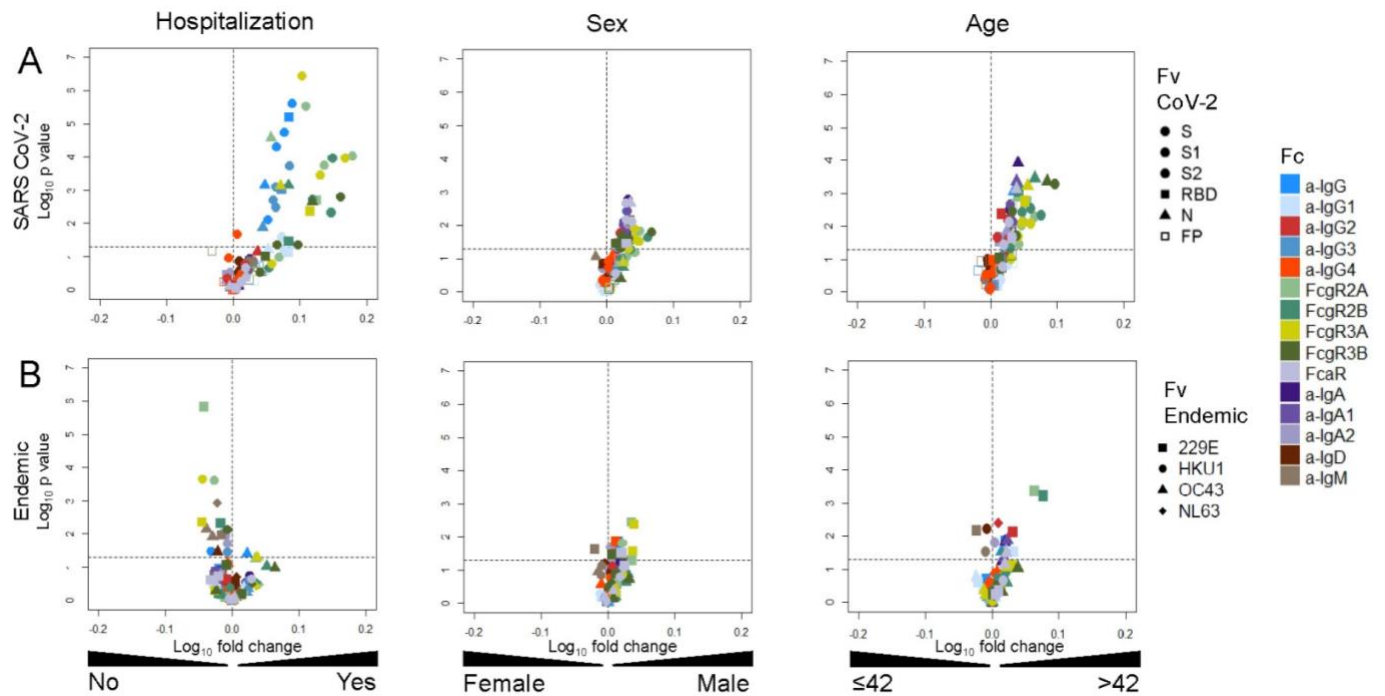

**Supplemental Figure 5. Antibody features associated with clinical status. A-B.** Volcano plots of significance and fold-change of response medians for antibody responses to SARS-CoV-2 (A) and endemic CoV (B) antigens according to hospitalization status (left), sex (center), and age above or below the cohort median (right). Symbol shapes indicate Fv specificity and color indicates Fc characteristic.

**Supplementary Table 1:** Demographic information on convalescent plasma (JHMI) and convalescent plasma samples (DHMC).

| <b>Characteristic</b>                         | <b>JHMI Convalescent</b><br>n=126 | <b>DHMC Convalescent</b><br>n=20 | <b>DHMC Naive</b><br>n=15 |
|-----------------------------------------------|-----------------------------------|----------------------------------|---------------------------|
| Median age (IQR), years                       | 42 (29-53)                        | 54 (45-62)                       | 34 (28-52)                |
| Sex                                           |                                   |                                  |                           |
| Female                                        | 58 (46%)                          | 10 (50%)                         | 8 (53.3%)                 |
| Male                                          | 68 (54%)                          | 10 (50%)                         | 7 (46.7%)                 |
| Hospitalized (severity)                       |                                   |                                  |                           |
| No                                            | 114 (90.5%)                       | 16 (80%)                         | NA                        |
| Yes                                           | 11 (8.7%)                         | 4 (20%)                          | NA                        |
| Unknown                                       | 1 (0.8%)                          |                                  |                           |
| Median days since PCR+ or symptom onset (IQR) | 43 (38-48)                        | 38 (33-45)                       | NA                        |

**Supplementary Table 2: Antigen and Fc Detection Reagents**

| <b>Antigen</b>                  | <b>Source</b>                      | <b>Fc Detection</b> | <b>Source</b>                       |
|---------------------------------|------------------------------------|---------------------|-------------------------------------|
| H1N1 HA1                        | Immune Technology<br>IT-003-00110p | a- IgG              | Southern Biotech<br>1030-09         |
| HSV gE                          | Immune Technology<br>IT-005-005p   | a-IgG1              | Southern Biotech<br>9054-09         |
| HCoV OC43 S                     | Sino Biological<br>40607-V08B      | a-IgG2              | Southern Biotech<br>9070-09         |
| OC43 S-2P                       | Expressed in HEK<br>293F           | a-IgG3              | Southern Biotech<br>9210-09         |
| 229E S1                         | Sino Biological<br>40605-V08H      | a-IgG4              | Southern Biotech<br>9200-09         |
| 229E S-2P                       | Expressed in Expi<br>293           | a-IgA               | Southern Biotech<br>2050-09         |
| HKU1 S1                         | Sino Biological<br>40606-V08H      | a-IgA1              | Southern Biotech<br>9130-09         |
| HKU S-2P                        | Expressed in Expi<br>293           | a-IgA2              | Southern Biotech<br>9140-09         |
| NL63 S1                         | Sino Biological<br>40604-V08H      | a-IgM               | Southern Biotech<br>9020-09         |
| MERS S1                         | Sino Biological<br>40069-V08H-50   | a-IgD               | Southern Biotech<br>9030-09         |
| MERS S-2P                       | Expressed in Expi<br>293           | Fc $\alpha$ R       | Duke Protein<br>Production Facility |
| SARS CoV-1 S1                   | Sino Biological<br>40150-V08B1     | Fc $\gamma$ R2a     | Boesch, et. al, 2014 <sub>1</sub>   |
| WIV1 S-2P                       | Expressed in Expi<br>293           | Fc $\gamma$ R2b     | Boesch, et. al, 2014 <sub>1</sub>   |
| SARS CoV-2 N                    | Immune Technology<br>IT-002-033Ep  | Fc $\gamma$ R3a     | Boesch, et. al, 2014 <sub>1</sub>   |
| SARS CoV-2 fusion<br>peptide    | New England<br>Peptide             | Fc $\gamma$ R3b     | Boesch, et. al, 2014 <sub>1</sub>   |
| SARS CoV-2 S1 (for Fc<br>Array) | ACROBiosystems<br>S1N-C52H3-100ug  |                     |                                     |
| SARS CoV-2 S1 (for<br>ADCD)     | Sino Biological<br>40150-V08B1-20  |                     |                                     |
| SARS CoV-2 RBD                  | BEI Resources<br>NR-52366          |                     |                                     |
| SARS CoV-2 S2                   | Immune Technology<br>IT-002-034p   |                     |                                     |
| SARS CoV-2 S-2P                 | Expressed in Expi<br>293           |                     |                                     |



**Supplementary Table 3.** Sample Dilutions in the Fc Array Assay

| <b>Sample Type</b> | <b>Dilution</b> | <b>Detection Reagent</b>                                                                                                                                                  |
|--------------------|-----------------|---------------------------------------------------------------------------------------------------------------------------------------------------------------------------|
| Serum and Plasma   | 1:5000          | anti-human IgG,<br>Fc $\gamma$ R2A, Fc $\gamma$ R2B,<br>Fc $\gamma$ R3A, Fc $\gamma$ R3B                                                                                  |
| Serum and Plasma   | 1:1000          | anti-human IgG1                                                                                                                                                           |
| Serum and Plasma   | 1:250           | anti-human IgA,<br>anti-human IgA1,<br>anti-human IgA2,<br>anti-human IgD,<br>anti-human IgM,<br>anti-human IgG2<br>anti-human IgG3,<br>anti-human IgG4,<br>Fc $\alpha$ R |
